# Supplementary material for: A Novel Indole Derivative with Superior Photophysical Performance for Fluorescent Probe, pH-Sensing, and Logic Gates
Source: MDPI journal article supplement (doi:10.3390/ijms24021711), 2023-01-15
Supplement: s1 [file s1]

# A Novel Indole Derivative with Superior Photophysical Performance for Fluorescent Probe, pH-Sensing, and Logic Gates

Hai-Ling Liu<sup>1,2</sup>, Kan Zhan<sup>3,\*</sup>, Kai-Liang Zhong<sup>1,\*</sup>, Xing-Liang Chen<sup>1</sup>, Xing-Hua Xia<sup>2</sup>

<sup>1</sup>School of Chemistry and Chemical Engineering, Shaoxing University, Shaoxing 312000, China

<sup>2</sup>State Key Laboratory of Analytical Chemistry for Life Science, School of Chemistry and Chemical Engineering; Nanjing University, Nanjing 210023, China

<sup>3</sup>College of Biotechnology and Bioengineering, Zhejiang University of Technology, Hangzhou 310014, China

## Table of Contents

1. Crystallographic Data for **PI**.
2. Crystallographic Data for **NI**.
3. Crystallographic Data for **TI**.
4. Crystallographic Data for **FI**.
5. NMR Spectra

**Table S1** Crystallographic Data for **PI**.

---

|                 |                                                               |
|-----------------|---------------------------------------------------------------|
| Formula sum     | C <sub>19</sub> H <sub>21</sub> N <sub>1</sub> O <sub>1</sub> |
| Space-group     | Cc                                                            |
| Cell parameters | a=13.659 Å b=15.138 Å c=8.158 Å α=90°<br>β=111.075(2)° γ=90°  |

CCDC deposition number: 1842009

**Table S2** Crystallographic Data for **NI**.

---

|                 |                                                                                                 |
|-----------------|-------------------------------------------------------------------------------------------------|
| Formula sum     | C <sub>19</sub> H <sub>22</sub> N <sub>2</sub>                                                  |
| Space-group     | Cc                                                                                              |
| Cell parameters | a=13.634 Å b=15.386 Å c=8.332 Å $\alpha=90^\circ$<br>$\beta=117.504(4)^\circ$ $\gamma=90^\circ$ |

CCDC deposition number: 1842008

**Table S3** Crystallographic Data for **TI**.

---

|                 |                                                                                               |
|-----------------|-----------------------------------------------------------------------------------------------|
| Formula sum     | C <sub>29</sub> H <sub>26</sub> N <sub>2</sub>                                                |
| Space-group     | P21/c                                                                                         |
| Cell parameters | a=11.26 Å b=14.997 Å c=13.15 Å $\alpha=90^\circ$ $\beta=92.035(3)^\circ$<br>$\gamma=90^\circ$ |

CCDC deposition number: 1842010

**Table S4** Crystallographic Data for **FI**.

---

|                 |                                                                                                 |
|-----------------|-------------------------------------------------------------------------------------------------|
| Formula sum     | C <sub>18</sub> H <sub>16</sub> F <sub>3</sub> N <sub>1</sub>                                   |
| Space-group     | C2/c                                                                                            |
| Cell parameters | a=30.843 Å b=6.528 Å c=17.909 Å $\alpha=90^\circ$<br>$\beta=122.058(3)^\circ$ $\gamma=90^\circ$ |

CCDC deposition number: 1842007

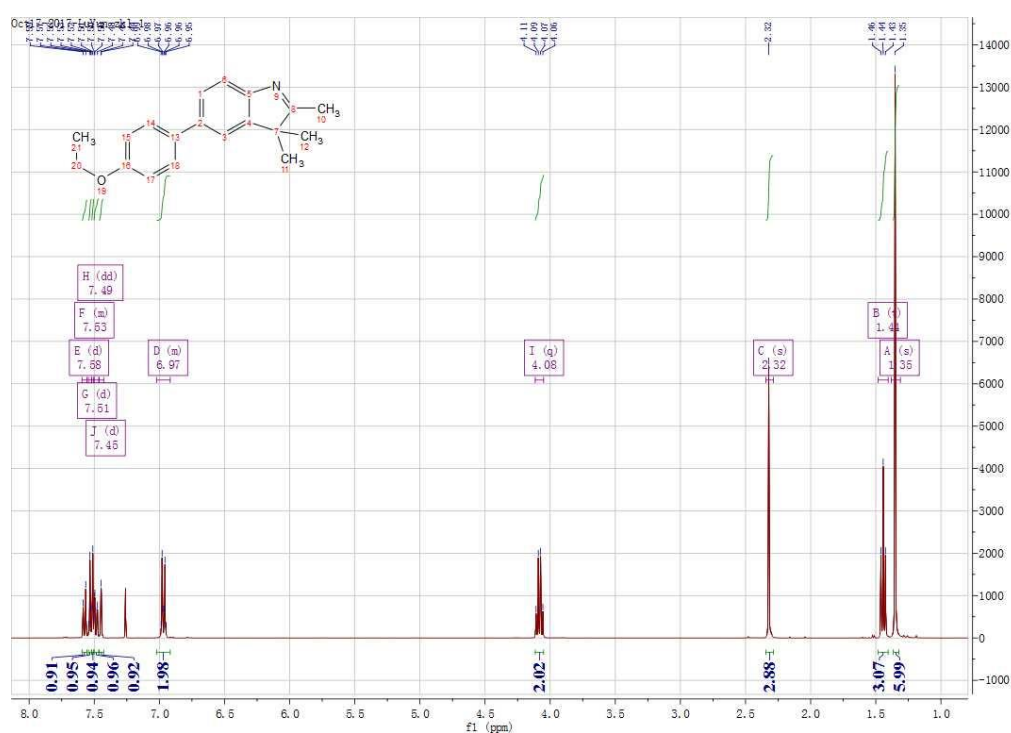

**Figure S1. The  $^1\text{H}$  NMR spectrum of PI.**

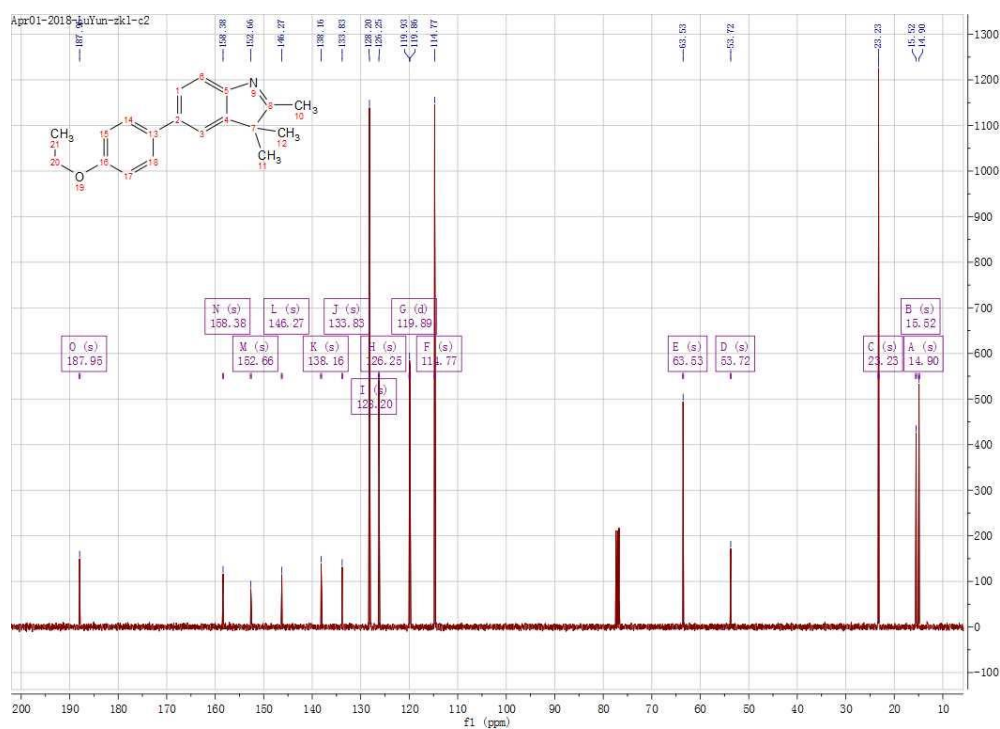

**Figure S2. The  $^{13}\text{C}$  NMR spectrum of PI.**

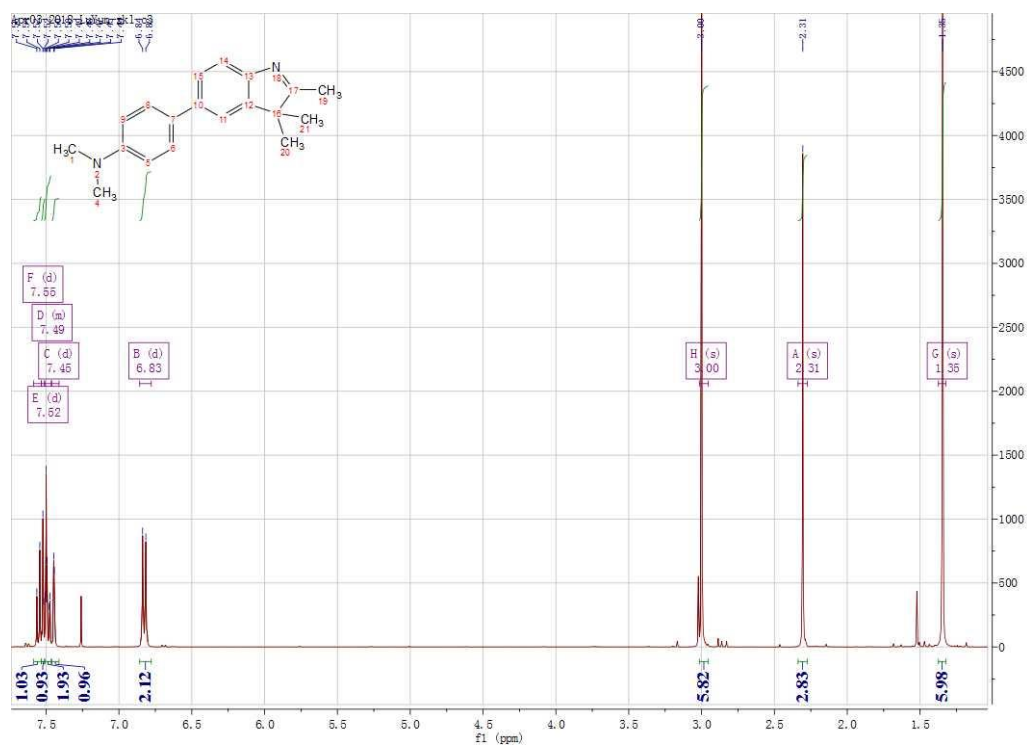

**Figure S3** The  $^1\text{H}$  NMR spectrum of NI.

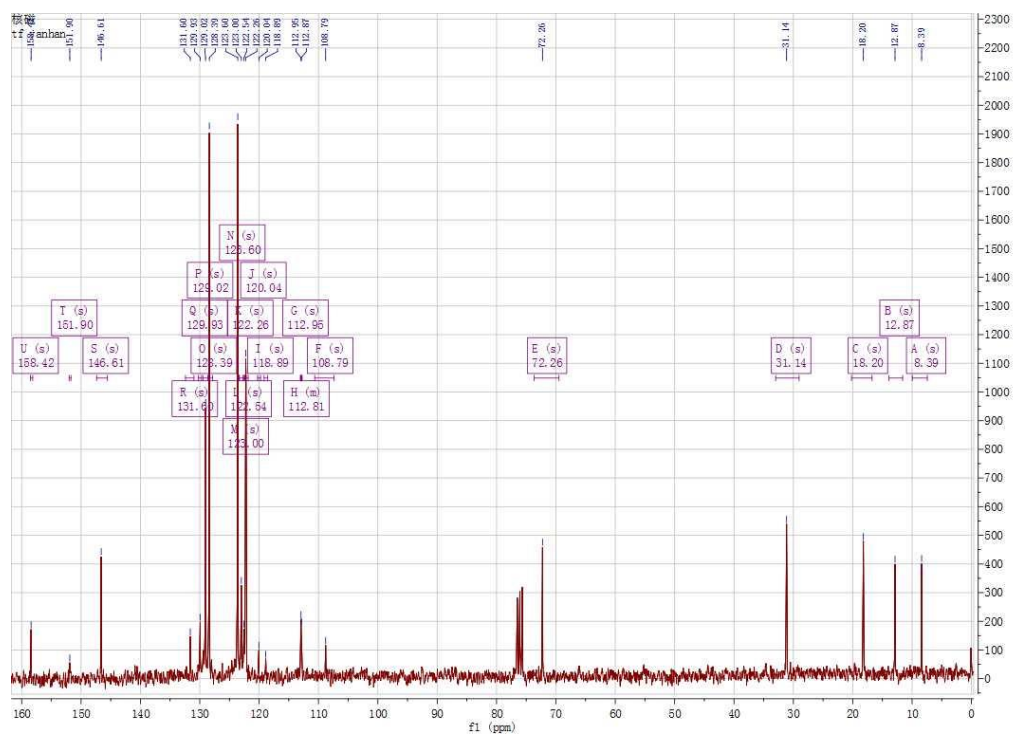

**Figure S4.** The  $^{13}\text{C}$  NMR spectrum of NI.

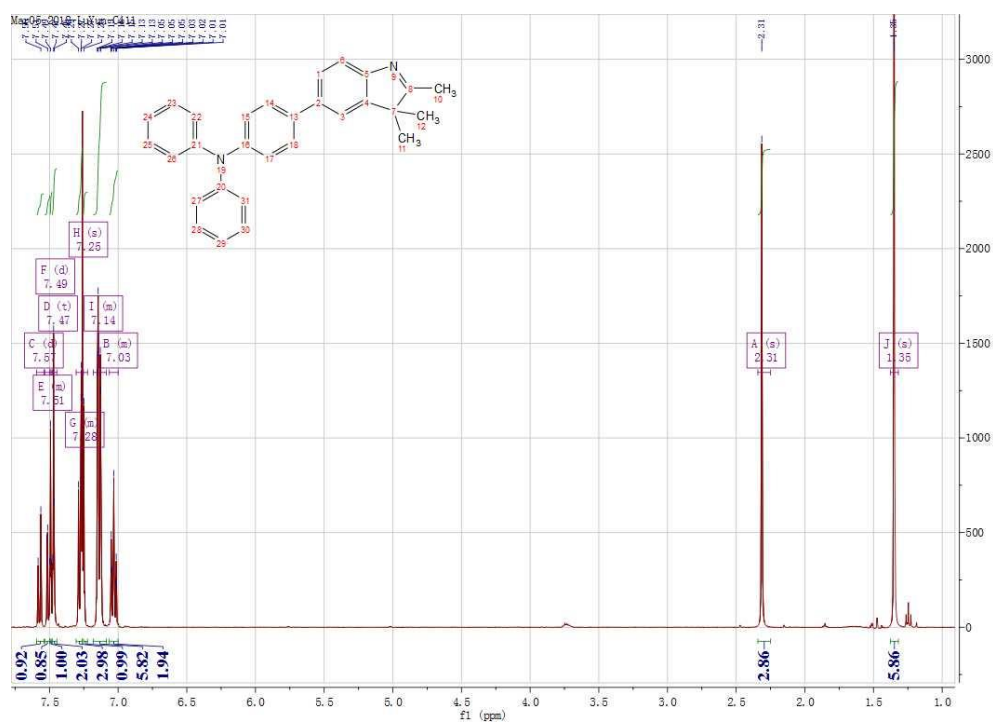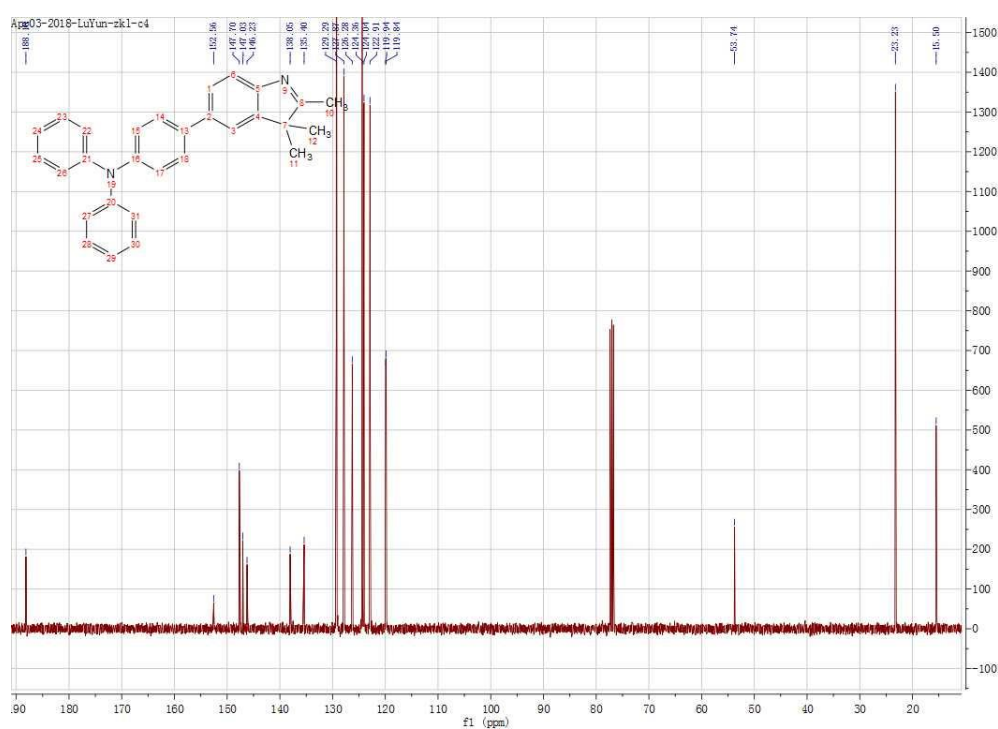

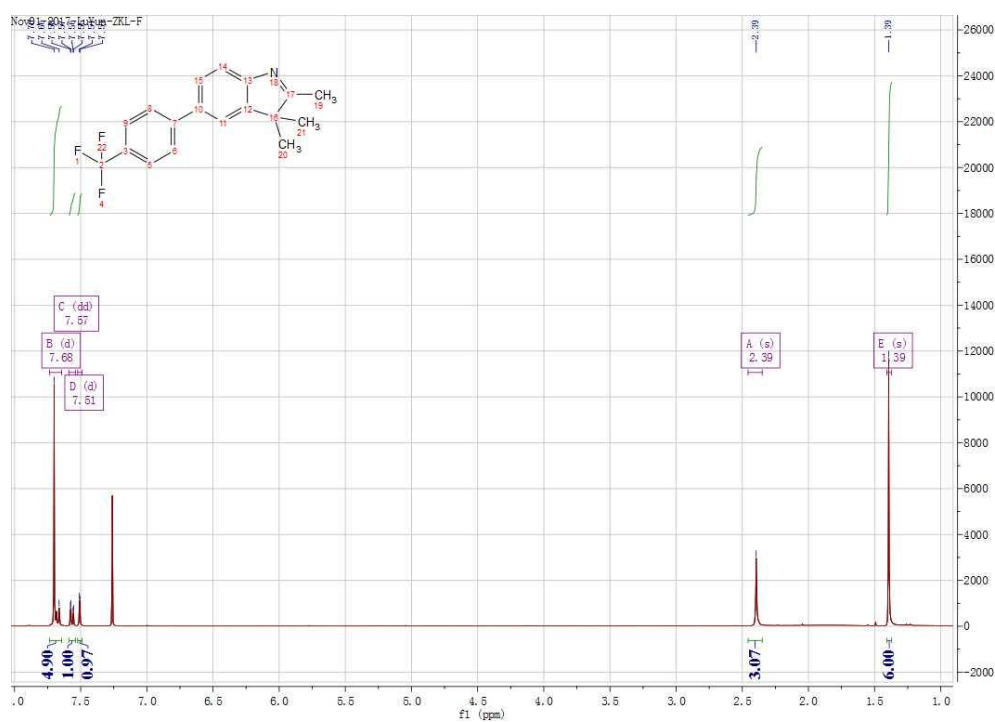

**Figure S7.** The  $^1\text{H}$  NMR spectrum of **FI**.

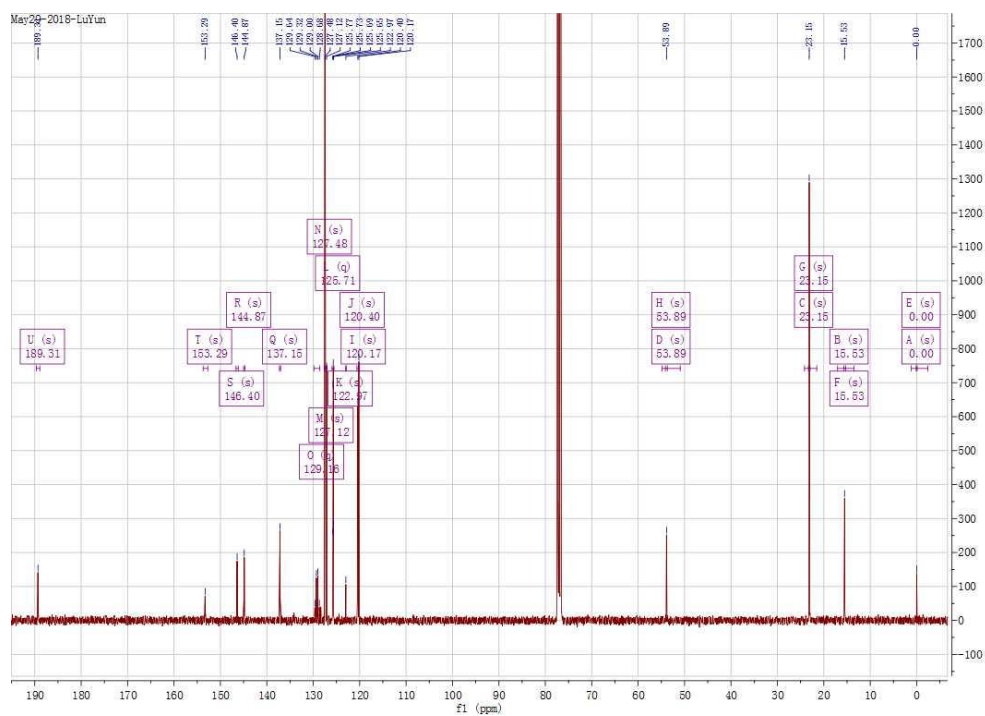

**Figure S8.** The  $^{13}\text{C}$  NMR spectrum of **FI**.
